# Supplementary material for: Model-based variables for the kinematic assessment of upper-extremity impairments in post-stroke patients
Source: PubMed Central journal article supplement (PMC5016877; doi:10.1186/s12984-016-0187-9), 2016-09-08
Supplement: 12984_2016_187_MOESM1_ESM.pdf [file 12984_2016_187_MOESM1_ESM.pdf]

Sub-acute  $T_0$

Sub-acute  $T_1$

Chronic  $T_0$

Chronic  $T_1$

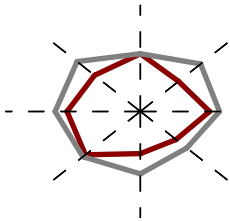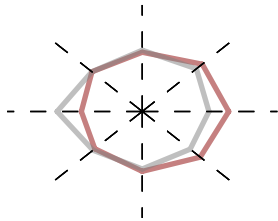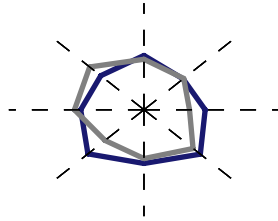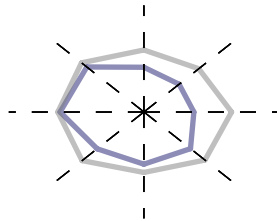

■ Sub-acute  $T_0$

■ Chronic  $T_0$

■ Model  $T_0$

■ Sub-acute  $T_1$

■ Chornic  $T_1$

■ Model  $T_1$
