# Supplementary material for: Model-based variables for the kinematic assessment of upper-extremity impairments in post-stroke patients
Source: PubMed Central journal article supplement (PMC5016877; doi:10.1186/s12984-016-0187-9), 2016-09-08

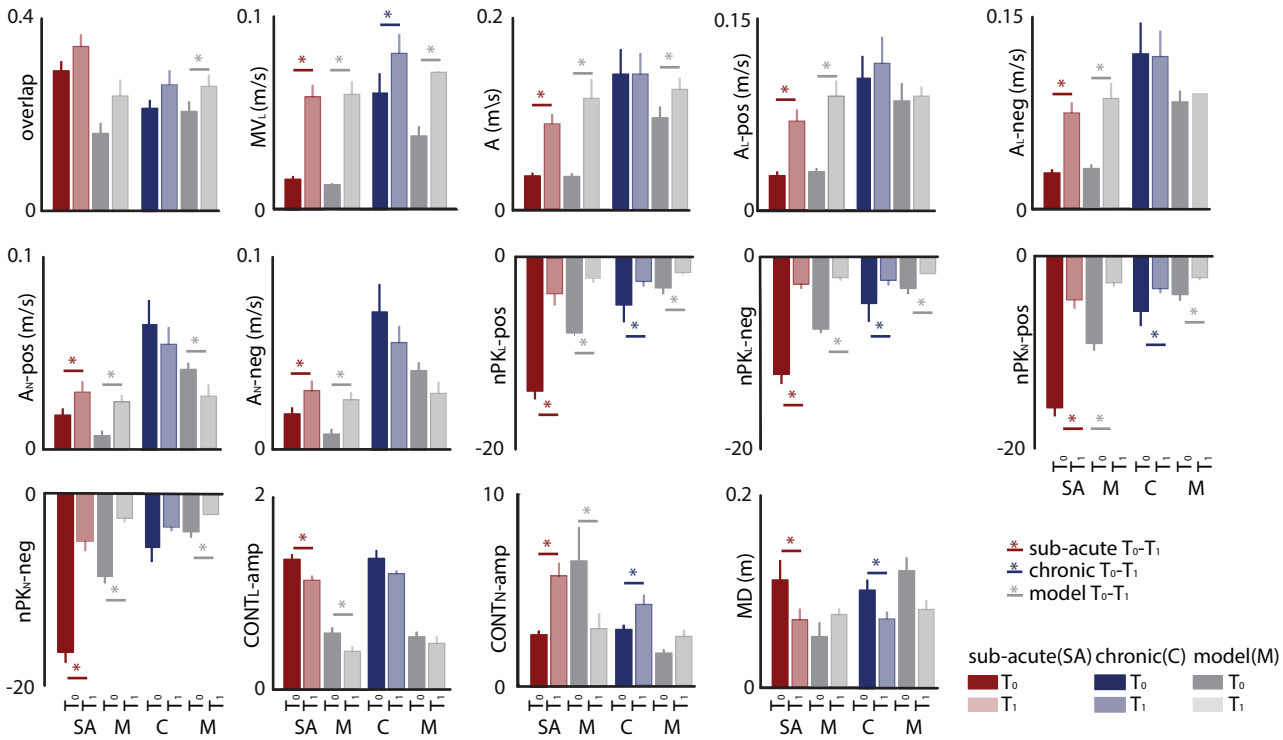

Supplement: 12984_2016_187_MOESM3_ESM.pdf [file 12984_2016_187_MOESM3_ESM.pdf]
